# Supplementary material
Source: publisher site journal article supplement (https://www.oncotarget.com/article/28497)
Supplement: Supplementary file 1 [file 28497]

## Addendum

**Addendum: Urine protein biomarkers of bladder cancer arising from 16-plex antibody-based screens****Kamala Vanarsa<sup>1</sup>, Shereen Enan<sup>1</sup>, Pooja Patel<sup>1</sup>, Briony Strachan<sup>1</sup>, Anto Sam Crosslee Louis Sam Titus<sup>1</sup>, Aphrihl Dennis<sup>2</sup>, Yair Lotan<sup>2</sup> and Chandra Mohan<sup>1</sup>**<sup>1</sup>Department Biomedical Engineering, University of Houston, Houston, TX, USA<sup>2</sup>Department of Urology, UT Southwestern Medical Center, Dallas, TX, USA**Published:****Copyright:** © 2023 Vanarsa et al. This is an open access article distributed under the terms of the [Creative Commons Attribution License](#) (CC BY 4.0), which permits unrestricted use, distribution, and reproduction in any medium, provided the original author and source are credited.**This article has an addendum:** No funding was used for this publication.Original article: Oncotarget. 2021; 12:783–790. <https://doi.org/10.18632/oncotarget.27941>
